# 1 **Genome regulation and gene interaction networks inferred from** 2 **muscle transcriptome underlying feed efficiency in Pigs**

3 **Victor AO. Carmelo<sup>1</sup> and Haja N. Kadarmideen<sup>1\*</sup>**

4 <sup>1</sup>Quantitative Genomics, Bioinformatics and Computational Biology Group, Department of Applied  
5 Mathematics and Computer Science, Technical University of Denmark, Richard Petersens Plads,  
6 Building 324, 2800, Kongens Lyngby, Denmark

7 **\*Correspondence:**  
8 Haja N. Kadarmideen

9 hajak@dtu.dk

10 Keywords: muscle transcriptome, pigs, feed efficiency, gene networks, candidate biomarkers

## 11 **Abstract**

12 **Improvement of feed efficiency (FE) is key for sustainability and cost reduction in pig**  
13 **production. Our aim was to characterize the muscle transcriptomic profiles in Danbred**  
14 **Duroc (Duroc) and Danbred Landrace (Landrace), in relation to FE for identifying**  
15 **potential biomarkers. RNA-seq data was analyzed employing differential gene expression**  
16 **methods, gene-gene interaction and network analysis, including pathway and functional**  
17 **analysis. We compared the results with genome regulation in human exercise data. In the**  
18 **differential expression analysis, 13 genes were differentially expressed, including:**  
19 ***MRPS11, MTRF1, TRIM63, MGAT4A, KLH30.* Based on a novel gene selection method,**  
20 **the divergent count, we performed pathway enrichment analysis. We found 5 significantly**  
21 **enriched pathways related to feed conversion ratio (FCR). These pathways were mainly**  
22 **mitochondrial, and summarized in the mitochondrial translation elongation (MTR)**  
23 **pathway. In the gene interaction analysis, highlights include the mitochondrial genes:**  
24 ***PPIF, MRPL35, NDUFS4* and the fat metabolism and obesity genes: *AACS, SMPDL3B,***  
25 ***CTNNB1, NDUFS4* and *LIMD2.* In the network analysis, we identified two modules**  
26 **significantly correlated with FCR. Pathway enrichment of modules identified MTR,**  
27 **electron transport chain and DNA repair as enriched pathways. In the network analysis,**  
28 **the mitochondrial gene group *NDUF* was a key hub group, showing potential as**  
29 **biomarkers. Comparing with human transcriptomic exercise studies, genes related to**  
30 **exercise displayed enrichment in our FCR related genes. We conclude that mitochondrial**  
31 **activity is a driver for FCR in muscle tissue, and mitochondrial genes could be potential**  
32 **biomarkers for FCR in pigs. We hypothesize that increased FE mimics processes**  
33 **triggered in exercised muscle.**

34

35

## 36 **Introduction**

37 In commercial pig production, the cost of feed is the highest individual economic factor (Jing, Hou et  
38 al. 2015, Gilbert, Billon et al. 2017). Furthermore, reduction in feed consumption per unit growth is  
39 beneficial for the environment, which is a key factor in being able to maintain sustainable and  
40 resource efficient production. In this context, there have been continuous efforts to increase feed  
41 utilization efficiency in pigs through selective breeding. In the Danish Production pig population,  
42 breeding is done at a core central facility where potential breeding sires are tested for FCR through  
43 accurate individual measurements of feed intake and growth. Danish production pigs are crossbreds,  
44 with the maternal line being Landrace x Danbred Yorkshire, and the paternal line being Durocs The  
45 Durocs are well-known for being heavily selected for growth and efficiency, while the two other  
46 breeds have had more heavy selection on litter size or piglet survival related traits.

47 Feed efficiency can be defined in several ways, with the main ones being Residual Feed Intake  
48 RFI(Koch 1963) and FCR. FCR is the ratio between feed consumed and growth, while RFI is based  
49 on the residual between predicted feed intake and actual feed intake given growth. In general, it is  
50 reported that selection for low FCR will result in co- selection for related traits, namely growth rate  
51 and body composition (Nkrumah, Basarab et al. 2007, Gilbert, Billon et al. 2017, Yi, Li et al. 2018).  
52 In contrast, selection for RFI is more directly focused on metabolic efficiency irrespective of daily  
53 gain and growth (Nkrumah, Basarab et al. 2007, Gilbert, Billon et al. 2017, Yi, Li et al. 2018). In  
54 general, RFI and FCR are strongly correlated, with a correlation above 0.7 and both show low to  
55 medium heritability(Do, Strathe et al. 2013). In general, FCR is simpler to calculate, as RFI  
56 calculation is dependent on individual population and production factors (Hoque, Kadowaki et al.  
57 2009, Do, Strathe et al. 2013). However, in pig production, the side effects of FCR selection and  
58 simplicity are desired traits, thus perhaps explaining why the pig population in Denmark and in  
59 general pig production, FCR has been the main efficiency phenotype used for selection (Gilbert,  
60 Billon et al. 2017). One can also hypothesize that FCR is more easily translatable between  
61 breeds/populations, as it is a simple dimensionless ratio, which has a simple and generally  
62 comparable interpretation. In contrast, it is more difficult to easily compare RFI values across  
63 different populations or breeds. In regards to the biological and/or genetic background of FCR in  
64 pigs, the results remain somewhat elusive(Ding, Yang et al. 2018), thus inviting for further analysis  
65 on the topic.

66 The key tissue in pig production is muscle, as pig carcasses are valued according to lean meat  
67 content. Skeletal muscle is a key organ in carbohydrate and lipid metabolism and plays a large part  
68 in the storage of energy from feed (Turner, Cooney et al. 2014, Morales, Bucarey et al. 2017),  
69 especially as lean growth has been one of the main goals of pig breeding programs. Increased  
70 efficiency has also been positively associated with various meat quality parameters (Czernichow,  
71 Thomas et al. 2010, Lefaucheur, Lebret et al. 2011, Smith, Gabler et al. 2011, Faure, Lefaucheur et  
72 al. 2013, Horodyska, Oster et al. 2018), showing that improved FE can have multiple positive  
73 outcomes. There are only a few studies analyzing muscle tissue transcriptome of pigs in a FE  
74 context (Jing, Hou et al. 2015, Vincent, Louveau et al. 2015, Gondret, Vincent et al. 2017,  
75 Horodyska, Wimmers et al. 2018), and thus our knowledge of the muscle transcriptomic background  
76 of FE is somewhat limited. In general, the studies available have relied on small sample sizes, weak  
77 statistical thresholds and categorical division of lines divergently selected for FE. This means that  
78 more studies are still needed to uncover the true underlying transcriptomic background of FE in  
79 muscle tissue.

80 Here, in our study, we aim to characterize the transcriptomic profiles and link them to FE traits  
81 measured in Duroc and Landrace, purebred pigs, by fitting FE as a continuous trait over a full  
82 spectrum of efficiency, from high to low. Furthermore, the pigs selected for the study all came out of  
83 the potential breeding sire population, with no pigs negatively selected for FE, thus better  
84 representing real world breeding scenarios than using negative FE selection. We analyzed the muscle  
85 transcriptome based on several layers of statistical-bioinformatics analyses: differential expression  
86 (DE), gene-gene interaction and network analysis, which was followed up by pathway and functional  
87 analysis. The rationale behind the approach was to reveal potential biomarkers that are functionally  
88 important and are predictive of FE in pigs. Dealing with complex yet subtle phenotypes can be a  
89 challenging, as the signal to noise ratio can be high, and it may be impractical or costly to collect  
90 large sample sizes. Therefore, we also suggest a novel method for selecting features based on overall  
91 p-value distributions, the divergent count.

92 To gain more insight on the molecular and functional background of FE, we also hypothesized, that  
93 the mechanism between differences in the muscle transcriptome of breeds with different efficiency  
94 could be similar to the differences between a rested and an exercised muscle, We adapted a  
95 translational genomics approach to investigate this, comparing human data with our data.

## 96 **Materials and Methods**

## 97 **Sampling and Sequencing**

98 In total, 41 purebred male uncastrated pigs were sampled for this study from two breeds, with 13  
99 Danbred Duroc and 28 Danbred Landrace pigs. All pigs were raised at a commercial breeding station  
100 at Børgildgaard owned by the pig research Centre of the Danish Agriculture and Food Council (SEGES).  
101 The pigs were raised from ~7kg until ~100kg at the breeding station. During this time, all feed intake  
102 was measured starting at 28kg and for a period of 40-70 days based on the viability of each pig. All  
103 pigs were routinely weighed several times, including at testing start and end for calculation of FCR.  
104 FCR was calculated by dividing the growth in the testing period with the feed consumption. Residual  
105 Feed Intake (RFI) was also estimated based on the residuals of the following model, from Do et al (Do,  
106 Strathe et al. 2013):

$$107 \quad DFI_{ij} = \mu + DWG_i + \beta_j$$

108 Where DFI is daily feed intake and DWG is daily weight gain in the period, and  $\beta$  is the batch effect.  
109 RFI was calculated separately for each breed, and based on data from a larger population (Duroc  $n=59$   
110 and Landrace  $n=50$ ).

111 Muscle tissue samples from the psoas major muscle were extracted immediately post slaughter and  
112 preserved in RNAlater (Ambion, Austin, Texas). Samples were kept at -25 C, as per protocol, until  
113 sequencing

### 114 Sequencing

115 Sequencing was done on BGISEQ-500 platform using the PE100 (pair end, 100bp length) with Oligo  
116 dT library prep at BGI Genomics.

117

## 118 **QC, Mapping and Read Quantification**

119 Reads were trimmed and adapters removed using Trimmomatic (Bolger, Lohse et al. 2014) version  
120 0.39 with default setting for paired end reads. The QC on the data was done both pre- and post-  
121 trimming using FastQC v0.11.9. The reads were mapped using STAR aligner (Dobin, Davis et al.  
122 2013) version 2.7.1a using default parameters with a genome index based on *sus scrofa* version 11.1  
123 and using ensemble annotation *sus scrofa* 11.1 version 96 for splice site reference. Default

124 parameters were used for mapping except for the addition of read quantification during mapping  
125 using the --quantMode GeneCounts setting. All statistic for the reads can be found in supplementary  
126 data 1.

127

## 128 **Differential Expression Analysis**

129 To analyze the relationship between FCR and gene expression, we applied the following overall  
130 model, and implemented it using several different methods:

$$132 \quad y_{ijklm} = \mu + \beta_{1_i}(FCR) + \beta_{2_j}(RIN) + \beta_{2_k}(age) + BR_l + BA_m + \epsilon \quad (1)$$

133  $y =$  normalized read counts

134  $\beta_1 =$  regression coefficient of feed conversion rate

135  $\beta_2 =$  regression coefficient of RIN (RNA Integrity value)

136  $\beta_3 =$  regression coefficient of Slaughter Age(days)

137  $BR =$  effect size of Breed

138  $BA =$  effect size of Batch

131

139 RNA integrity value (RIN) should be corrected for, as it affects expression, and the most appropriate  
140 way to correct this is to include it in the model(Gallego Romero, Pai et al. 2014). As the samples had  
141 different slaughter days, which affected the collection conditions, we also deemed it necessary to  
142 correct for this via the batch effect. Finally, we correct for Breed and age at slaughter, as these are  
143 biological factors, which can cause differences in expression.

144 We used the following 3 methods for the DEA: Limma (Ritchie, Phipson et al. 2015), edgeR  
145 (Robinson, McCarthy et al. 2010) and Deseq2(Love, Huber et al. 2014). This was done to increase  
146 the robustness of our analysis, as our phenotype of interest is expected to have a subtle effect on the  
147 transcriptome due to the complex nature of FE. In addition, we also fit the model for each breed  
148 separately using Deseq2, just removing the Breed as a covariate.

## 149 **Deseq2**

150 We used Deseq2 version 1.22.2. In the Deseq2 analysis, the counts were filtered a priori requiring a  
151 minimum of 5 reads for each sample, resulting in a total of 10765 out of 25880 genes being included

152 in the DE analysis in the common breed analysis, and 10687 and 11107 in Landrace and Duroc  
153 respectively. As the overall read counts were very similar across experiments ( see supplementary  
154 data 1), it was deemed sufficient to filter pre normalizing. We then used the default analysis method  
155 based on our specified model.

## 156 **Limma**

157 We used Limma version 3.38.3. For the Limma analysis, the counts were filtered based on the edgeR  
158 *filterByExpr* function and normalized using *calcNormFactors* from the same package, as suggested in  
159 the limma manual. This resulted in the inclusion of 11146 genes in the analysis. To fit the model we  
160 used the *eBayes* method in conjunction with our specified model.

## 161 **EdgeR**

162 We used edgeR 3.24.3. We used the same normalization and filtering as in the Limma analysis, thus  
163 including the same number of genes. We used the *glmQLfit* function and *glmQLTest* to implement  
164 our model.

165 While we used to different set sizes in the analysis, this does not affect the results significantly, as the  
166 genes omitted in the Deseq2 analysis are all lowly expressed. Furthermore, in our further analysis we  
167 elected to use the smaller and more conservative Deseq2 set to become our reference set for  
168 selections and analysis. **Gene Pathway Analysis**

## 169 **Gene selection**

170 To select a robust set of genes for a gene enrichment analysis when we have non-conservative p-  
171 value but only a limited number of genes with a FDR below 0.05, we applied the following strategy:

- 172 - Identify the overrepresentation of (low) p-values in comparison to a uniform p-value  
173 distribution in our data. We will call this the divergent count.
- 174 - Select the top N genes by p-value, where N is the estimated divergent count
- 175 - Among the top N genes, select those that are found in all three methods.

176 To find the divergent count D, we find the interval with the maximum positive divergence between  
177 our observed empirical p-values and the same number of uniformly distributed p-values. It is  
178 calculated as follows:

179 
$$(1) d_i = \left( \sum_{n=1}^{i-1} x_i \begin{cases} 0 & \text{for } x_i \geq \frac{i}{n} \\ 1 & \text{for } x_i < \frac{i}{n} \end{cases} \right) - i$$

180 
$$(2) D = \max\{d_1, d_2 \dots d_n\}$$

181 Where  $n$  is the total number of p-values,  $x_i$  is the  $i$ 'th observed p-value in increasing order. Here  $i$  is  
182 both the index for  $x$  and the expected number of p-values between 0 and  $\frac{i}{n}$  given a uniform  
183 distribution.  $D$  is the final divergent count, which is the maximum over all possible values of  $d$ .

#### 184 *GORilla*

185 To perform gene enrichment in GOrilla (Eden, Lipson et al. 2007, Eden, Navon et al. 2009), we  
186 translated our *sus scrofra* ensemble gene IDs into human ensemble gene IDs. The background set of  
187 genes used in GOrilla was the set of genes from the Deseq2 analysis. We used default settings.  
188 Furthermore, we used the Revigo (Supek, Bosnjak et al. 2011) analysis through GOrilla to generate  
189 summaries of our enrichment analysis, using default settings.

#### 190 **Feed Efficiency measure**

191 In this study, we elected to use weight gain/feed intake as our FCR measure. It fit the data better than  
192 RFI, and FCR is the metric used in the breeding program of our pigs.

#### 193 **Pairwise Gene interaction Analysis**

194 To continue our analysis of the top set of genes identified using the divergent counts in our DE  
195 analysis, we decided to apply a pairwise interaction model. First, we adjust the expression based on  
196 any factors and covariates that may affect expression for each gene. These factors are the same as in  
197 the general DE analysis, giving rise to the following linear model:

198 
$$y_{jklm} = \mu + \beta_{1_j}(RIN) + \beta_{2_k}(age) + BR_l + BA_m + \epsilon \quad (2)$$

199  $y = \text{normalized read counts}$

200  $\beta_1 = \text{regression coefficient of RIN (RNA Integrity value)}$

201  $\beta_2 = \text{regression coefficient of Slaughter Age(days)}$

202  $BR = \text{Breed}$

203  $BA = \text{Batch}$



204 We then centered and scaled the residuals and then run a model for all pairwise gene interaction in  
205 our gene set. The reason we scaled and centered is that this leads to a more flexible and interpretable  
206 model regardless of the type of interaction. The interaction model was as follows:

$$208 \quad y_i = \mu + \beta_1 x_{1_j} + \beta_2 x_{2_k} + \beta_3 (x_{1_j} \times x_{2_k}) + \epsilon \quad (3)$$

209  $y = FCR \text{ values}$

207  $\beta_1 = \text{regression coefficient of residual expression of gene 1}$

210  $\beta_2 = \text{regression coefficient of residual expression of gene 1}$

211  $\beta_3 = \text{regression coefficient of the interaction between gene 1 and gene 2}$

212  $x_{1_j} = \text{residual expression of gene 1}$

213  $x_{2_k} = \text{residual expression of gene 2}$

214  $(x_{1_j} \times x_{2_k}) = \text{product of the two residual expression values}$

215 The next step was then to identify significant interactions. As the number of interaction in a dataset  
216 grows exponentially to the square of the input space, it is often difficult to detect effects based on  
217 classical multiple testing correction methods such as Bonferroni or FDR. This is especially true when  
218 dealing with complex phenotypes, as we generally do not expect to find individual large effects. Due  
219 to this, instead of focusing on individual results, for each gene, we calculated the divergent count, to  
220 assess the divergence of each genes distribution of interaction p-values. We then bootstrapped with  
221 replacement samples of 853 p-values from our empirical p-values  $10^5$  times, calculating the divergent  
222 count each time, giving us a bootstrapped distribution of divergent counts, to compare with our  
223 empirical distribution

## 224 **Network analysis**

225 To perform network analysis we used WGCNA(Langfelder and Horvath 2008). First, we filtered the  
226 read counts to only include genes with a minimum of 5 un-normalized reads, as was done for the  
227 Deseq2 analysis. We then created a correlation matrix based on all pairwise correlation in the data.  
228 The correlation matrix was based on un-normalized values as the correlation metric is based of  
229 comparison of the samples with themselves, thus it is not affected by the covariates. We then fit the  $\beta$   
230 parameter for the scaling of the network to create a scale free topology(Zhang and Horvath 2005).  
231 The scaled correlation matrix was used as an adjacency matrix that was used to generate the



232 Topological Overlap Measures (TOM), which represents the final calculation of the relation between  
233 genes.

234 The TOM values of the genes were clustered using the *dynamicTreeCut* function from the  
235 *dynamicTreeCut* cut package with default setting, resulting in a number of modules which are  
236 arbitrarily named based on colors.

237 The eigenvalue of each module was then calculated based on the normalized read counts and RIN  
238 adjusted count. We did these corrections in this step to remove the technical effects of library size  
239 differences and RIN from the eigenvalues, as we did not want technical effects to affect the  
240 eigenvalues. The counts were normalized based on the *calcNormFactors* function from the edgeR  
241 package. After this, the counts were adjusted for RIN by fitting the following linear model:  
242  $expression = \mu + RIN + \epsilon$  for all genes, and extracting the residual expression values. Highly  
243 correlating modules were merged using the *mergeCloseModules* function using a default cut-off. We  
244 then calculated the Pearson correlation between corrected and normalized module eigenvalues and  
245 our traits and covariates. Pathway analysis was performed on the genes of highly correlated modules,  
246 with GOrilla and ReviGO as seen above. Finally, we also identified the top hub genes in relevant  
247 modules. This was done based on calculating the intramodular connectivity using the  
248 *intramodularConnectivity* function with default settings. We then selected the top hub genes based on  
249 the kWithin measure, which represents the connectivity within modules.

## 250 **Comparison to human exercise data**

251 To test the hypothesis that differences in the muscle tissue transcriptome of Duroc and Landrace  
252 and/or FCR related genes mimic differences in rested and exercised muscle tissue, we compared our  
253 results with three human data sets (Murton, Billeter et al. 2014, Devarshi, Jones et al. 2018, Popov,  
254 Makhnovskii et al. 2019). For each data set, we performed the following:

- 255 1. Select the genes differentially expressed between breeds, based on the edgeR analysis
- 256 2. For FCR, use the 853 genes from divergent count set
- 257 3. Find the same set of genes in the human data – the breed/FCR matching genes. Genes are  
258 matched using the biomart R package, based on retrieving the external\_gene\_name of our sus  
259 scrofa ensemble gene identifiers.
- 260 4. Separate the human data into two parts – the breed matching set and the background set

- 261 5. Using a Fisher Exact test, compare the number of differentially expressed genes for the  
262 exercised vs rested muscle in the background set vs the breed matching set.  
263 6. The steps for the breed were also applied to our divergent count set for FCR.

264

265 The reason edgeR was used in this part of the analysis, was because it was more flexible to fit to the  
266 publicly available data, allowing to compare our results to the other studies. As each dataset was  
267 formatted and analyzed differently, we had to process them individually. In the data set from  
268 Devarshi et al(dataset 1)(Devarshi, Jones et al. 2018), we chose to use the lean pre exercise vs lean  
269 post exercise group as our comparison, and significance was based on the reported cuffdiff analysis.  
270 For the set of Murton et al(dataset 2)(Murton, Billeter et al. 2014), we pooled all control vs exercise  
271 samples and analyzed them using Limma as the data was microarray data, using the same Limma  
272 pipeline as mentioned above in our FE analysis. As the results were weaker in Murton et al, we chose  
273 to use  $P < 0.05$  as a cutoff for the Fisher exact test. For the set from Popov et al(dataset 3)(Popov,  
274 Makhnovskii et al. 2019), we grouped all the 4h post exercise results vs all 4h control non-exercised  
275 and performed DE analysis using edgeR with no other covariates using the same settings as our FE  
276 analysis above, with significance based on the found FDR values.

## 277 **Results**

### 278 **Differential Expression analysis**

279 In figure 1 we can see the visualization of the PCA analysis of the count data. There is one main  
280 point: there is no clear pattern separating the breeds based on the first two components. Based on the  
281 lack of separation of the breeds we gain confidence in the application of a common breed analysis.  
282 Any of the lower variance components have a lower proportion of the variation explained than the  
283 two observed Principal Components, therefore we are confident that no major proportion of the  
284 variation is directly driven by breed. We do observe a significant and detectable effect of breed  
285 expression level (as seen further down), meaning there are features in our data which *can* separate the  
286 breeds.

287 In figure S1 we can see the distribution of the uncorrected p-values for the Deseq2 analysis in our  
288 two breeds in relation to FCR with the corresponding figure for the common analysis in figure  
289 2(right). In total, the Landrace analysis had one gene with an  $FDR < 0.1$ , and Duroc had 8, and we

290 found 4 in the common breed analysis. Overall, we only find a limited set of genes associated with  
291 FCR. In table 1, we see the overview over the genes that were differentially expressed at the 0.1  
292 FDR level in the common and individual breed analysis from Deseq2. As in previous studies, we find  
293 genes related to mitochondria (MRPS11, MTRM1) and glucose a related gene (*MGAT4A*)(*Ohtsubo,*  
294 *Takamatsu et al. 2005*). We also find genes that have been associated with meat quality phenotypes  
295 in cattle and pig (MTRF1, KLH30) (Jiang, Michal et al. 2009, Chung, Lee et al. 2015, Dos Santos  
296 Silva, Fonseca et al. 2019). Perhaps the most interesting result, is that one of the genes in the Duroc  
297 analysis, TRIM63, has been associated as a biomarker for differences in response to exercise induced  
298 muscle damage (Baumert, G-REX Consortium et al. 2018), which ties into our comparison to human  
299 data below.

300 As the results were somewhat limited, we chose to continue with a different strategy in the joint  
301 breed analysis. Based on the results in figure 2, we see that p-values had an overall anti-conservative  
302 distribution for FE in the joint analysis, which showed us some promise for further analysis. We  
303 chose to calculate the DE using 3 methods, as we wanted to ensure that our results were robust and  
304 replicable, knowing that individual methods can vary in output (Seyednasrollah, Laiho et al. 2015).  
305 In figure 2 we can see the overview of the distribution of uncorrected p-values for FCR in all 3  
306 methods, showing an anti-conservative distribution regardless of the method. If FCR was unrelated to  
307 gene expression in general, we would expect a uniform p-value distribution in our model. We can  
308 statistically confirm the likelihood of our observed p-values under the null hypothesis of no relation  
309 between expression and FCR using a Kolmogorov-Smirnov test, and in all 3 methods we reject the  
310 null hypothesis with (p-value <  $10^{-16}$ ). This leads us to conclude that there is a relation between the  
311 muscle tissue expression and FCR. In table 2 we can see the overview over the significance of our  
312 covariates in the 3 methods used for DE analysis. The most significant covariate is RIN, highlighting  
313 the importance of correcting for the RIN values when analyzing samples acquired in a non-laboratory  
314 setting. It has been previously shown that while RIN values do have an impact on expression values,  
315 explicitly controlling for this in a modelling framework should appropriately correct the data in most  
316 data points (Gallego Romero, Pai et al. 2014). Furthermore, we see that many genes are differentially  
317 expressed between the breeds, which is expected, and that age has an impact on expression. To  
318 quantify the observed link between expression and FE, we continue with two strategies – analyzing  
319 the overall pathway enrichments for the most significant genes and creating gene expression modules  
320 based on network analysis of our gene expression profiles.

## 321 **Enrichments Analysis**

322 The first step in an enrichment analysis is to select a suitable set of genes. The most general strategy  
323 is to pick genes that are differentially expressed after multiple testing correction for such a set. In our  
324 analysis, we do not have enough of these for a meaningful enrichment analysis, but we are able to  
325 demonstrate an overall relation between FCR and gene expression as seen above in figure 2. In our  
326 case, we could select genes with an uncorrected p-value below 0.05, but this is somewhat arbitrary  
327 distinction(Butler and Jones 2018). Instead, we chose to make an estimation of the number of  
328 additional low p-values in comparison to the uniformly distributed p-values, which represents the  
329 null hypothesis of no overall relation between FCR and gene expression. We call this value the  
330 divergent count. In essence, we are estimating the interval with the maximum positive divergence  
331 between our observed p-value frequencies and the same number of uniformly distributed p-values,  
332 assuming an approximately monotonely decreasing p-value distribution in our results. This has the  
333 advantage of not relying on arbitrary cutoffs but instead being a property of the overall p-value  
334 distribution. In figure 3, we can see a schematic representation of the divergent count. In Figure 4  
335 we can see the a Venn diagram showing the overall divergent counts and overlaps for all three  
336 methods, with the full overlap set being the final gene set for enrichment analysis. We can see that a  
337 majority of the selected genes are identified by all three methods. This gives us confidence in the  
338 robustness of the selected set. To identify enriched functional pathways in our dataset, we chose to  
339 use is GOrilla(Eden, Navon et al. 2009). In GOrilla it is possible to give a background set to base the  
340 analysis on, making it advantageous for expression data, as it allows us only to use genes actually  
341 expressed in our data as a background. For the full output of the analysis, see supplementary table 2.  
342 Overall, 5 terms were significant post multiple corrections, with 4 out of these being related to  
343 mitochondrial ontologies In figure 5 we can see a summarized output of the significant post multiple  
344 testing correction GO-terms and groups based on the GOrilla analysis, using Revigo(Supek, Bosnjak  
345 et al. 2011). Based on this, the important overall pathway was translation elongation.

## 346 **Gene Interaction Analysis**

347 Many strategies can be used to take advantage of the interaction or co-expression between genes. We  
348 propose to apply modelling of pairwise gene interactions, which explicitly includes the phenotype of  
349 choice, which in our case is FE. This can be advantageous when dealing with complex phenotypes,  
350 as it may allow us to capture subtle biological variation. We chose to perform the gene interaction  
351 analysis based on the set of genes we identified from the divergent counts in our DE analysis. The

352 visualization of the empirical divergent counts and the bootstrapped counts can be found in  
353 supplementary figure 2. Based on these results, the maximum bootstrapped divergent count was 83,  
354 and we observed 193 genes with a divergent count over 83. This means that many of the genes' p-  
355 value distributions are very anticonservative, and not very likely to happen by chance. There is  
356 however, the issue of data independence, as the genes' results are not independent from each other.  
357 Due to this, and general concern of data size and weak effects we used a conservative qualitative  
358 heuristic and focused on the top 20 genes based on our methodology. From the top 20 genes (see  
359 supplementary data 3 for the full results), the overall highlights were several transcription regulators:  
360 ETV1( an androgen receptor activate gene), LF1 (transcription factor) and KDM4C (transcription  
361 activator and growth related gene) (Bray and Kafatos 1991, Cai, Hsieh et al. 2007, Gregory and  
362 Cheung 2014); two mitochondrial genes, KMO and MRPS11(Meinke, Kerr et al. 2019);; two genes  
363 related to muscular atrophy - GEMIN7 and PLPP7 (Baccon, Pellizzoni et al. 2002, Meinke, Kerr et  
364 al. 2019); on gene implicated in heart development BIN1 (Nicot, Toussaint et al. 2007), two lipid  
365 metabolism/obesity related genes ACOT11 and GPD1 (ADAMS, CHUI et al. 2001) (Park, Berggren  
366 et al. 2006); and finally 3 genes associated with specific traits in pig IL2RG (Immune system in  
367 pigs)(Suzuki, Iwamoto et al. 2012), GGPS1 ( meat quality) and PPARA (weak association with fat  
368 percentage) (Szczerbal, Lin et al. 2007). Interestingly, MRPS11 was also differentially expressed.

369

## 370 **Gene Network Analysis**

371 Based on our network analysis, we identified 19 distinct modules after correcting for RIN and  
372 merging the modules based on similarity. Based on the DE analysis, we decided not to focus  
373 individually on Landrace or Duroc pigs in the network analysis, and thus the network was generated  
374 combining both breeds. Looking at the the clustering in figure 6a,, initially one might think that the  
375 network is poorly constructed, as the module dendrogram representation is not very clear. In general,  
376 we see that some modules look closely clustered based on the dendrogram, such as the red module,  
377 while other are more diffuse. We should however realize that the modules themselves are based on N  
378 x N matrix, where n is >10.000. Thus, it is not easy to represent the modules properly in lower  
379 dimensions. Therefore, we rely on the module eigenvalue trait correlation and pathway analysis of  
380 the modules to asses if they are biologically meaningful. In figure 6b we can see the correlation  
381 between the eigenvalue of the modules and the traits and covariates we included in the DE analysis.  
382 We observe that the RIN correction of the individual genes has removed all the effect of the RIN on

383 the eigenvalues of our modules. Several of the modules are well correlated with the breed and age,  
384 with correlation  $> 0.5$ , while FCR is mainly correlated with two modules, red and turquoise. The red  
385 and turquoise module include 391 and 3744 genes, respectively. Based on these results we performed  
386 GO-term analysis on the red and turquoise module. The red module is more correlated to breed and  
387 age than FCR, but we know that breed and FCR are correlated, and in our data, age is correlated with  
388 FCR (0.5). It should be noted that the age and FCR correlation is caused by the higher FCR pigs in  
389 our data exhibiting lower growth rates, thus needing more time to reach the tissue sampling as the  
390 slaughter takes place at a target weight of approximately 100 kg. The turquoise module shows  
391 highest correlations in FCR. In figure 7 we see the Revigo summary of the GOrilla GO term analysis  
392 performed based on the genes in the red (a) and turquoise (b) modules. In both the red and turquoise  
393 modules, a large number of GO terms were significantly overrepresented after multiple testing  
394 correction (see supplementary data 4 and 5 for the full list for red and turquoise respectively),  
395 indicating that the modules do represent specific biological pathways. In the red module, the most  
396 significant group of terms were related to mitochondria, which were grouped into three overall  
397 groups – translation elongation, electron transport chain and hydrogen ion transmembrane transport.  
398 This mirrors our finding from the DE analysis and the gene interaction analysis. As the module has a  
399 negative correlation with FCR, it indicates a relation between higher mitochondrial activity and lower  
400 FCR, thus higher efficiency. In the turquoise module, there was one large grouping of terms – DNA  
401 repair. This category included many GO terms, related to RNA, DNA, amino acid and nucleic acid  
402 metabolism and processing. These processes could be seen as generic growth and maintenance  
403 processes, and as the module is positively correlated with FCR, we can speculate the higher activity  
404 in DNA repair and related processes are increasing energy spend on maintenance, thus lowering  
405 efficiency. Due to the size of the module and the processes involved, it seems that the turquoise  
406 module is generically associated with overall cell maintenance and growth processes, giving it a  
407 somewhat unspecific functionality. In supplementary data 6 we find the top 10 most connected genes  
408 in the red and turquoise module. Interestingly, in the red module 7 out of 10 genes belong to the  
409 NADH ubiquinone oxidoreductase group (NDUF), with the remaining 3 also being implicated in  
410 mitochondrial function. Thus, the mitochondrial genes are both overrepresented in the red module  
411 and the most connected within the module. In the turquoise module, the results are unclear, as the  
412 most connected genes do not belong to any specific process, but instead cover a range of general  
413 processes that are generally important for cell function. This agrees with the general observation  
414 based on the size of the module and the overrepresented GO terms.



## 415 **Human Exercise Data**

416 To test they hypothesis that improvements in efficiency could be linked to a state mimicking  
417 exercise, we compared our divergent counts genes for FCR and the genes differentially expressed  
418 between breeds with 3 different human exercise datasets [33-35]. The results can be found in table 3.  
419 We are comparing if there is a higher proportion of genes that are significant for exercise-mediated  
420 changes in our two subsets, breed and FCR related genes, in relation to the non-differentially  
421 expressed genes. We see that in all cases there is a higher proportion of significant genes in the breed  
422 and FCR set versus the background set, as the odds ratio between the subsets and the background is  
423 always below 1. In general, the breed results are more significant than the FCR genes, but they show  
424 similar ratios. This is likely because there are roughly 4 times more breed genes, yielding higher  
425 statistical power. Given the overall results, it does seem like both FCR and breed related genes are  
426 slightly more significant than background for exercise related changes. We also did the pathway  
427 enrichment analysis for the genes that where significant in both one of our three human data sets and  
428 in the breed, and FCR set respectively. The overall results are found in figure 7a (breed) and  
429 7b(FCR). In the breed, we find that main categories are cellular metal ion homeostasis and  
430 anatomical structure development, based on 702 genes. For FCR, only 42 genes overlap with the  
431 human significant genes, meaning the results of the enrichment are not as significant, but the main  
432 overall group is regulation of transcription from RNA polymerase II promoter.

## 433 **Discussion**

434 There have been 4 previous studies analyzing the muscle transcriptome in an FE context (Jing, Hou  
435 et al. 2015, Vincent, Louveau et al. 2015, Gondret, Vincent et al. 2017, Horodyska, Wimmers et al.  
436 2018). The study by Gondret et al [18] was based on selecting divergent FE lines of Large White pigs  
437 for 8 generations, used 24 samples and was based on microarray. They reported a high number of  
438 differentially expressed genes in muscle between the low and high RFI groups (2417), but it is not  
439 clear from their paper how many probes were included in the statistical analysis and how this may  
440 affect multiple testing correction. They also reported that a gene was considered differentially  
441 expressed if one probe met the cutoff regardless of multiple probes did not. They reported that  
442 mitochondrial electron chain transport, glucose metabolic process and generation of precursor  
443 metabolites and energy as significant pathways for RFI.



444 In the study from Horodyska et al [17], they used 16 pigs, but included 8 pigs of each gender. They  
445 used an uncorrected p-value of 0.01 as their threshold,, with no consideration weather this is  
446 appropriate given their overall data distribution. They report 272 genes with p-value < 0.01, which is  
447 similar to ours of 243, however we have included less genes in our analysis (14497 vs 10563).  
448 Overall, we cannot assess their results as very significant.

449 In Vincent et al [20], they had 16 female Large Whites from divergent RFI lines, their study was  
450 microarray based, but they reported their results based on uncorrected p-values in both expression  
451 and proteomics. They do however report finding mitochondrial related probes being significant.

452 Finally, in Jing et al [19], they had a total sample size of only 6 Yorkshire pigs, based on the  
453 selection of the most extreme RFI pigs in a set of 236. They reported 645 DE genes, with 99 with  
454 FDR lower than 0.05. However, selecting such few samples at the extreme end of FE does raise the  
455 question of replication, as the large differences in RFI/FCR they achieved could easily be caused by  
456 factors that are not generally applicable. They found that the most significant pathways in their data  
457 were mitochondrial activity, glycolysis and myogenesis pathways. Despite the issues presented with  
458 the studies, it is notable that mitochondria are reported to be related to FE multiple times.

459 In our study, we have the highest number of samples reported (41) and we include two breeds, which  
460 do not have directly divergent selection for FCR, but with one of the breeds more positively  
461 selected for FCR. Having this setup does present advantages and disadvantages. The advantage in  
462 relation to the other studies it that the results may generalize better across breeds. The disadvantage is  
463 that we may be fitting breed effects instead of phenotypic effects, but we do account for breed in all  
464 our analysis. The other main difference is that we have selected pigs with a range of FCR values, and  
465 fit FCR as a continuous value. In general fitting a continuous value is more informative, and the fact  
466 that we have a range of pigs that are not divergently selected, may make the results more applicable  
467 to a real life setting. In pig production there is no low FE selected line to contrast with, so the  
468 biological background of FE in a normal breeding population may be more relevant and interesting.

469 Another general issue is how to deal with statistical issues in analysis of FE. From the various studies  
470 presented above it is clear that FE is a somewhat subtle phenotype in muscle tissue, and thus a lot of  
471 data is needed make conclusions. Here we try to tackle this issue by not being overly conservative,  
472 but still applying multiple testing correction by using and FDR of 0.1 level for individual results in

473 our DE analysis. Furthermore, we generally try to analyze our data by either taking the overall  
474 distribution of results and/or combing genes in groups, to avoid relying on individual weak results.

### 475 **Differential Expression analysis and Pathway Enrichment**

476 We have analyzed the transcriptomic differences and molecular pathways involved in differences in  
477 FCR in two different breeds. Based on DE, we identified 14 genes with an FDR value below 0.1.  
478 The highlights here were the finding of mitochondrial genes, and TRIM64, which related to exercise  
479 induced muscle damage.

480 Due to the limited results in the DE analysis, we chose to use a novel approach to perform a pathway  
481 enrichment analysis. In practice, we wanted to broaden the number of genes for the pathway analysis,  
482 but at the same time also select a robust and meaningful set of genes. To make the analysis more  
483 robust, we choose to base the pathway analysis on results from 3 DE expression methods.  
484 Furthermore, we elected to select genes based on the overall divergence from the null hypothesis of  
485 our p-value distribution, as this should represent a set of genes that is likely to be associated with our  
486 trait, even the genes are not significant based on individual FDR corrected p-values . To our  
487 knowledge, this is a novel way of selecting a group of genes, which we called the divergent count.  
488 Looking at the enriched pathways in our dataset selected based on the divergent counts, we find  
489 results that are common in the literature in several species beyond the pig studies already  
490 mentioned(Connor, Kahl et al. 2010, Bottje, Lassiter et al. 2017), namely differences in  
491 mitochondrial pathways related to FE, summarized as mitochondrial translation elongation in our  
492 Revigo summary. While this is not a novel result, we did find it in a novel setting, with larger  
493 sample size, novel population selection and using a continuous value for FCR. This acts as further  
494 evidence to the link of mitochondrial activity and FE, but also as evidence that it may be relevant in  
495 real breeding populations, and not only in divergently selected test populations.

### 496 **Gene Expression Interaction**

497 Our gene expression interaction analysis is a novel way of finding the most important genes, which  
498 has not been applied to FE in pigs before. Based on the qualitative analysis of the top 20 genes, the  
499 results seem promising. We found several transcription factors, including the most divergent gene  
500 (ELF1), which makes sense in regards to gene interaction. The remaining genes also seemed  
501 promising, as they included categories one can expect to be related to muscle growth and FCR, such

502 as lipid metabolism and muscle atrophy. Confirming previous results, we also identified two  
503 mitochondrial genes among the top 20.

#### 504 **Gene Network Analysis**

505 Our gene network analysis revealed two modules with a correlation  $> 0.4$  with FCR. Based on the  
506 GO term analysis enrichment of the red module, we find many enriched GO terms related to  
507 mitochondrial processes, confirming our finding in the other analysis, and from other studies. More  
508 specifically, the negative correlation between the red module eigenvalue and FCR also shows that  
509 higher mitochondrial activity is positively associated with higher efficiency. Based on the top ten hub  
510 genes in the red module we confirm this picture, as all ten genes are related to mitochondria, and  
511 seven of them are from the NDUF family, which was also found in the gene expression interaction  
512 analysis. The turquoise module was the most correlated module(0.49), and furthermore, it was more  
513 correlated to FCR than to our other traits. Based on the GO term analysis, we found that the cluster  
514 was highly enriched for genes related to DNA repair, which included GO terms relate to RNA, DNA,  
515 amino acid and nucleic acid metabolism and processing. To the best of our knowledge, this is the  
516 first evidence of these processes being related to FE in general. The only previous link to DNA repair  
517 in livestock was a feed restriction study of cattle(Connor, Kahl et al. 2010). The top ten hub genes of  
518 this module did not show a clear picture, with the genes involved in a wide range of processes related  
519 to general cell maintenance. This indicates that the turquoise module represents general housekeeping  
520 functions, rather than very specific pathways. As the module eigenvalue was positively correlated  
521 with FCR, we can speculate that more active DNA repair and maintenance processes represent higher  
522 maintenance costs, thus reducing efficiency.

523

#### 524 **Human Exercise**

525 We have established earlier that the gene expression and molecular background of FE is still  
526 somewhat elusive. To try and identify what overall mechanisms could be at play, we hypothesized  
527 that differences between our two breeds, which have different overall FE, and genes related to FCR,  
528 are more likely to be important for processes involved in exercise. The reason we had this hypothesis,  
529 is that the pigs are selected for lean growth, and it is possible that this growth stimulus is similar to  
530 the effects induced in muscle by exercise. We found a slight confirmation of this hypothesis, as we  
531 found similar favorable odds ratio for our hypothesis in all 3 datasets we tested for both FCR and our

532 breed genes. Our pathway enrichment analysis for FCR did not yield any very significant results, as it  
533 was only based on 42 genes. The main overall category identified, based on 4 go terms, was  
534 regulation of transcription from RNA polymerase II (pol II) promoters. Interestingly, Actin has been  
535 associated with the pre-initiation complex necessary for transcription by RNA polymerase  
536 II(Hofmann, Stojiljkovic et al. 2004), which could be relevant given the importance of actin in  
537 muscle tissue(Tang 2015). There are also links between a poll II subunit and myogenesis (CORBI,  
538 PADOVA et al. 2002). Although these results may be relevant, our data here is too weak for solid  
539 conclusions.

540 In regards to the genes overlapping between exercise and breed differences, the results are more  
541 statistically robust, as they are based on an overall larger gene set of 702 genes. Here we find two  
542 overall groups – cellular metal ion homeostasis and anatomical structure development. For the first  
543 term, we know that the transport of ions is generically vital to muscle function (Wolitzky and  
544 Fambrough 1986, Mohr, Krstrup et al. 2007). The second overall term, anatomical structure  
545 development, is very generic in terms of function, and includes sub-categories that are related to  
546 muscle development, such as muscle structure development.

547 Overall, the results from the Human data analysis represent a novel hypothesis, but requires more  
548 analysis and new experiments on pigs to strengthen the link between FE and exercise. One interesting  
549 aspect of this analysis is that in theory pigs could be used as a model for lean growth in sedentary  
550 conditions, which in the long run could yield interesting therapeutic possibilities applicable to  
551 humans.

## 552 **Conclusion**

553 We have analyzed the muscle transcriptome from Duroc and Landrace, twp of the main purebred  
554 breeding pigs in Denmark. In contrast to previous studies, we did not use any lines divergently  
555 selected for FE, and we included a wider range of FE values, which were modelled as a continuous  
556 trait, using the highest number of pigs in a study of this type. We identified several individual genes  
557 based on DE analysis and gene-gene interaction analysis that are involved in FCR, with many of  
558 them having relevant functional backgrounds from previous studies. We applied a novel strategy to  
559 select genes for pathway enrichment, the divergent count. Based on enrichment analysis, gene-gene  
560 interaction, network analysis and DE we found several interesting candidate biomarkers genes and  
561 pathways. We reinforced the knowledge that mitochondrial activity is important FCR, but using a

562 non-divergently FE selected pig population. Based on the findings, we postulate that mitochondrial  
563 genes, and in particular genes from NDUF group or MRPS11 could be used as potential biomarkers  
564 for FCR in pigs. Furthermore, all our top genes from our interaction analysis also show promise as  
565 potential FCR biomarkers. Finally, we find that there is a putative link between genes involved in  
566 exercise related changes in human, and FE in pigs

### 567 **Conflict of Interest**

568 There were no conflicts of interest.

569

### 570 **Ethics**

571 As animals were only sampled post conventional slaughter, no ethics approval was needed for the  
572 study.

### 573 **Author Contributions**

574 HNK conceived and designed the project and obtained funding as the main applicant. VAOC and  
575 HNK designed the muscle sampling experiments, phenotype data collection and  
576 statistical/bioinformatics analyses. VOAC performed the sampling, data processing, data  
577 visualization and bioinformatics and statistical analysis. All authors collaborated in the interpretation  
578 of results, discussion and write up of the manuscript. All authors have read, reviewed and approved  
579 the final manuscript.

### 580 **Funding**

581 This study was funded by the Independent Research Fund Denmark (DFF) – Technology and  
582 Production (FTP) grant (grant number: 4184-00268B). VAOC received partial Ph.D. stipends from  
583 the University of Copenhagen and Technical University of Denmark. The Authors thank the SEGES  
584 – Pig Research Centre (VSP) Denmark and Danish Crown for access to samples and phenotype  
585 datasets.

### 586 **Acknowledgments**

587 We would like to thank all group members of the Quantitative Genomics, Bioinformatics and  
588 Computational Biology Group for participating in discussion when needed and creating a fruitful  
589 scientific environment.

### 590 **References**

591 Muscle as a Secretory Organ. Comprehensive Physiology: 1337-1362.

592 ADAMS, S. H., C. CHUI, S. L. SCHILBACH, X. X. YU, A. D. GODDARD, J. C. GRIMALDI, J.  
593 LEE, P. DOWD, S. COLMAN and D. A. LEWIN (2001). "BFIT, a unique acyl-CoA thioesterase  
594 induced in thermogenic brown adipose tissue: cloning, organization of the human gene and  
595 assessment of a potential link to obesity." Biochemical Journal **360**(1): 135-142.

- 596 Baccon, J., L. Pellizzoni, J. Rappsilber, M. Mann and G. Dreyfuss (2002). "Identification and  
597 Characterization of Gemin7, a Novel Component of the Survival of Motor Neuron Complex."  
598 Journal of Biological Chemistry **277**(35): 31957-31962.
- 599 Baumert, P., G-REX Consortium, M. J. Lake, B. Drust, C. E. Stewart and R. M. Erskine (2018).  
600 "TRIM63 (MuRF-1) gene polymorphism is associated with biomarkers of exercise-induced muscle  
601 damage." Physiological Genomics **50**(3): 142-143.
- 602 Bolger, A. M., M. Lohse and B. Usadel (2014). "Trimmomatic: a flexible trimmer for Illumina  
603 sequence data." Bioinformatics **30**(15): 2114-2120.
- 604 Bottje, W. G., K. Lassiter, A. Piekarski-Welsher, S. Dridi, A. Reverter, N. J. Hudson and B. W. Kong  
605 (2017). "Proteogenomics Reveals Enriched Ribosome Assembly and Protein Translation in Pectoralis  
606 major of High Feed Efficiency Pedigree Broiler Males." Front Physiol **8**: 306.
- 607 Bray, S. J. and F. C. Kafatos (1991). "Developmental function of Elf-1: an essential transcription  
608 factor during embryogenesis in *Drosophila*." Genes & Development **5**(9): 1672-1683.
- 609 Butler, J. and P. Jones (2018). "Theoretical and empirical distributions of the p value." Metron-  
610 International Journal of Statistics **76**(1): 1-30.
- 611 Cai, C., C.-L. Hsieh, J. Omwancha, Z. Zheng, S.-Y. Chen, J.-L. Baert and L. Shemshedini (2007).  
612 "ETV1 Is a Novel Androgen Receptor-Regulated Gene that Mediates Prostate Cancer Cell Invasion."  
613 Molecular Endocrinology **21**(8): 1835-1846.
- 614 Chung, H. Y., K. T. Lee, G. W. Jang, J. G. Choi, J. G. Hong and T. H. Kim (2015). "A genome-wide  
615 analysis of the ultimate pH in swine." Genet Mol Res **14**(4): 15668-15682.
- 616 Connor, E. E., S. Kahl, T. H. Elsasser, J. S. Parker, R. W. Li, C. P. Van Tassell, R. L. Baldwin and S.  
617 M. Barao (2010). "Enhanced mitochondrial complex gene function and reduced liver size may  
618 mediate improved feed efficiency of beef cattle during compensatory growth." Functional &  
619 Integrative Genomics **10**(1): 39-51.
- 620 CORBI, N., M. D. PADOVA, R. D. ANGELIS, T. BRUNO, V. LIBRI, S. IEZZI, A. FLORIDI, M.  
621 FANCIULLI and C. PASSANANTI (2002). "The  $\alpha$ -like RNA polymerase II core subunit 3 (RPB3)  
622 is involved in tissue-specific transcription and muscle differentiation via interaction with the  
623 myogenic factor Myogenin." The FASEB Journal **16**(12): 1639-1641.
- 624 Czernichow, S., D. Thomas and E. Bruckert (2010). "n-6 Fatty acids and cardiovascular health: a  
625 review of the evidence for dietary intake recommendations." Br J Nutr **104**(6): 788-796.
- 626 Devarshi, P. P., A. D. Jones, E. M. Taylor and T. M. Henagan (2018). "Effects of Acute Aerobic  
627 Exercise on Transcriptomics in Skeletal Muscle of Lean vs Overweight/Obese Men." The FASEB  
628 Journal **32**(1\_supplement): lb248-lb248.
- 629 Ding, R., M. Yang, X. Wang, J. Quan, Z. Zhuang, S. Zhou, S. Li, Z. Xu, E. Zheng, G. Cai, D. Liu,  
630 W. Huang, J. Yang and Z. Wu (2018). "Genetic Architecture of Feeding Behavior and Feed  
631 Efficiency in a Duroc Pig Population." Front Genet **9**: 220.
- 632 Do, D. N., A. B. Strathe, J. Jensen, T. Mark and H. N. Kadarmideen (2013). "Genetic parameters for  
633 different measures of feed efficiency and related traits in boars of three pig breeds." J Anim Sci  
634 **91**(9): 4069-4079.
- 635 Dobin, A., C. A. Davis, F. Schlesinger, J. Drenkow, C. Zaleski, S. Jha, P. Batut, M. Chaisson and T.  
636 R. Gingeras (2013). "STAR: ultrafast universal RNA-seq aligner." Bioinformatics **29**(1): 15-21.



- 637 Dos Santos Silva, D. B., L. F. S. Fonseca, D. G. Pinheiro, M. M. M. Muniz, A. F. B. Magalhaes, F.  
638 Baldi, J. A. Ferro, L. A. L. Chardulo and L. G. de Albuquerque (2019). "Prediction of hub genes  
639 associated with intramuscular fat content in Nelore cattle." *BMC Genomics* **20**(1): 520.
- 640 Eden, E., D. Lipson, S. Yogev and Z. Yakhini (2007). "Discovering motifs in ranked lists of DNA  
641 sequences." *PLoS Comput Biol* **3**(3): e39.
- 642 Eden, E., R. Navon, I. Steinfeld, D. Lipson and Z. Yakhini (2009). "GORilla: a tool for discovery and  
643 visualization of enriched GO terms in ranked gene lists." *BMC Bioinformatics* **10**: 48.
- 644 Faure, J., L. Lefaucheur, N. Bonhomme, P. Ecolan, K. Meteau, S. M. Coustard, M. Kouba, H. Gilbert  
645 and B. Lebret (2013). "Consequences of divergent selection for residual feed intake in pigs on muscle  
646 energy metabolism and meat quality." *Meat Sci* **93**(1): 37-45.
- 647 Gallego Romero, I., A. A. Pai, J. Tung and Y. Gilad (2014). "RNA-seq: impact of RNA degradation  
648 on transcript quantification." *BMC Biol* **12**: 42.
- 649 Gilbert, H., Y. Billon, L. Brossard, J. Faure, P. Gatellier, F. Gondret, E. Labussiere, B. Lebret, L.  
650 Lefaucheur, N. Le Floch, I. Louveau, E. Merlot, M. C. Meunier-Salaun, L. Montagne, P. Mormede,  
651 D. Renaudeau, J. Riquet, C. Rogel-Gaillard, J. van Milgen, A. Vincent and J. Noblet (2017).  
652 "Review: divergent selection for residual feed intake in the growing pig." *Animal* **11**(9): 1427-1439.
- 653 Gondret, F., A. Vincent, M. Houee-Bigot, A. Siegel, S. Lagarrigue, D. Causeur, H. Gilbert and I.  
654 Louveau (2017). "A transcriptome multi-tissue analysis identifies biological pathways and genes  
655 associated with variations in feed efficiency of growing pigs." *BMC Genomics* **18**(1): 244.
- 656 Gregory, B. L. and V. G. Cheung (2014). "Natural variation in the histone demethylase, KDM4C,  
657 influences expression levels of specific genes including those that affect cell growth." *Genome*  
658 *Research* **24**(1): 52-63.
- 659 Hofmann, W. A., L. Stojiljkovic, B. Fuchsova, G. M. Vargas, E. Mavrommatis, V. Philimonenko, K.  
660 Kysela, J. A. Goodrich, J. L. Lessard, T. J. Hope, P. Hozak and P. de Lanerolle (2004). "Actin is part  
661 of pre-initiation complexes and is necessary for transcription by RNA polymerase II." *Nature Cell*  
662 *Biology* **6**(11): 1094-1101.
- 663 Hoque, M. A., H. Kadowaki, T. Shibata, T. Oikawa and K. Suzuki (2009). "Genetic parameters for  
664 measures of residual feed intake and growth traits in seven generations of Duroc pigs." *Livestock*  
665 *Science* **121**(1): 45-49.
- 666 Horodyska, J., M. Oster, H. Reyer, A. M. Mullen, P. G. Lawlor, K. Wimmers and R. M. Hamill  
667 (2018). "Analysis of meat quality traits and gene expression profiling of pigs divergent in residual  
668 feed intake." *Meat Sci* **137**: 265-274.
- 669 Horodyska, J., K. Wimmers, H. Reyer, N. Trakooljul, A. M. Mullen, P. G. Lawlor and R. M. Hamill  
670 (2018). "RNA-seq of muscle from pigs divergent in feed efficiency and product quality identifies  
671 differences in immune response, growth, and macronutrient and connective tissue metabolism." *BMC*  
672 *Genomics* **19**(1): 791.
- 673 Jiang, Z., J. J. Michal, J. Chen, T. F. Daniels, T. Kunej, M. D. Garcia, C. T. Gaskins, J. R. Busboom,  
674 L. J. Alexander, R. W. Wright, Jr. and M. D. Macneil (2009). "Discovery of novel genetic networks  
675 associated with 19 economically important traits in beef cattle." *Int J Biol Sci* **5**(6): 528-542.
- 676 Jing, L., Y. Hou, H. Wu, Y. Miao, X. Li, J. Cao, J. M. Brameld, T. Parr and S. Zhao (2015).  
677 "Transcriptome analysis of mRNA and miRNA in skeletal muscle indicates an important network for  
678 differential Residual Feed Intake in pigs." *Sci Rep* **5**: 11953.



- 679 Jing, L., Y. Hou, H. Wu, Y. X. Miao, X. Y. Li, J. H. Cao, J. M. Brameld, T. Parr and S. H. Zhao  
680 (2015). "Transcriptome analysis of mRNA and miRNA in skeletal muscle indicates an important  
681 network for differential Residual Feed Intake in pigs." Scientific Reports **5**.
- 682 Koch, R. M., Swiger, L. A., Chambers, D. J. & Gregory K. E (1963). "Efficiency of feed use in beef  
683 cattle." Journal of Animal Science **22**(2): 486-494.
- 684 Langfelder, P. and S. Horvath (2008). "WGCNA: an R package for weighted correlation network  
685 analysis." BMC Bioinformatics **9**: 559.
- 686 Lefaucheur, L., B. Leuret, P. Ecolan, I. Louveau, M. Damon, A. Prunier, Y. Billon, P. Sellier and H.  
687 Gilbert (2011). "Muscle characteristics and meat quality traits are affected by divergent selection on  
688 residual feed intake in pigs." J Anim Sci **89**(4): 996-1010.
- 689 Love, M. I., W. Huber and S. Anders (2014). "Moderated estimation of fold change and dispersion  
690 for RNA-seq data with DESeq2." Genome Biol **15**(12): 550.
- 691 Meinke, P., A. R. W. Kerr, R. Czapiewski, J. I. de las Heras, C. R. Dixon, E. Harris, H. Kölbel, F.  
692 Muntoni, U. Schara, V. Straub, B. Schoser, M. Wehnert and E. C. Schirmer (2019). "A multistage  
693 sequencing strategy pinpoints novel candidate alleles for Emery-Dreifuss muscular dystrophy and  
694 supports gene misregulation as its pathomechanism." EBioMedicine.
- 695 Mohr, M., P. Krstrup, J. J. Nielsen, L. Nybo, M. K. Rasmussen, C. Juel and J. Bangsbo (2007).  
696 "Effect of two different intense training regimens on skeletal muscle ion transport proteins and  
697 fatigue development." American Journal of Physiology-Regulatory, Integrative and Comparative  
698 Physiology **292**(4): R1594-R1602.
- 699 Morales, P. E., J. L. Bucarey and A. Espinosa (2017). "Muscle Lipid Metabolism: Role of Lipid  
700 Droplets and Perilipins." Journal of Diabetes Research **2017**: 10.
- 701 Murton, A. J., R. Billeter, F. B. Stephens, S. G. D. Etages, F. Graber, R. J. Hill, K. Marimuthu and P.  
702 L. Greenhaff (2014). "Transient transcriptional events in human skeletal muscle at the outset of  
703 concentric resistance exercise training." Journal of Applied Physiology **116**(1): 113-125.
- 704 Nicot, A.-S., A. Toussaint, V. Tosch, C. Kretz, C. Wallgren-Pettersson, E. Iwarsson, H. Kingston, J.-  
705 M. Garnier, V. Biancalana, A. Oldfors, J.-L. Mandel and J. Laporte (2007). "Mutations in  
706 amphiphysin 2 (BIN1) disrupt interaction with dynamin 2 and cause autosomal recessive  
707 centronuclear myopathy." Nature Genetics **39**(9): 1134-1139.
- 708 Nkrumah, J. D., J. A. Basarab, Z. Wang, C. Li, M. A. Price, E. K. Okine, D. H. Crews, Jr. and S. S.  
709 Moore (2007). "Genetic and phenotypic relationships of feed intake and measures of efficiency with  
710 growth and carcass merit of beef cattle1." Journal of Animal Science **85**(10): 2711-2720.
- 711 Ohtsubo, K., S. Takamatsu, M. T. Minowa, A. Yoshida, M. Takeuchi and J. D. Marth (2005).  
712 "Dietary and genetic control of glucose transporter 2 glycosylation promotes insulin secretion in  
713 suppressing diabetes." Cell **123**(7): 1307-1321.
- 714 Park, J.-J., J. R. Berggren, M. W. Hulver, J. A. Houmard and E. P. Hoffman (2006). "GRB14, GPD1,  
715 and GDF8 as potential network collaborators in weight loss-induced improvements in insulin action  
716 in human skeletal muscle." Physiological Genomics **27**(2): 114-121.
- 717 Popov, D. V., P. A. Makhnovskii, E. I. Shagimardanova, G. R. Gazizova, E. A. Lysenko, O. A.  
718 Gusev and O. L. Vinogradova (2019). "Contractile activity-specific transcriptome response to acute  
719 endurance exercise and training in human skeletal muscle." Am J Physiol Endocrinol Metab **316**(4):  
720 E605-E614.

- 721 Ritchie, M. E., B. Phipson, D. Wu, Y. Hu, C. W. Law, W. Shi and G. K. Smyth (2015). "limma  
722 powers differential expression analyses for RNA-sequencing and microarray studies." Nucleic Acids  
723 Res **43**(7): e47.
- 724 Robinson, M. D., D. J. McCarthy and G. K. Smyth (2010). "edgeR: a Bioconductor package for  
725 differential expression analysis of digital gene expression data." Bioinformatics **26**(1): 139-140.
- 726 Seyednasrollah, F., A. Laiho and L. L. Elo (2015). "Comparison of software packages for detecting  
727 differential expression in RNA-seq studies." Brief Bioinform **16**(1): 59-70.
- 728 Smith, R. M., N. K. Gabler, J. M. Young, W. Cai, N. J. Boddicker, M. J. Anderson, E. Huff-  
729 Lonergan, J. C. Dekkers and S. M. Lonergan (2011). "Effects of selection for decreased residual feed  
730 intake on composition and quality of fresh pork." J Anim Sci **89**(1): 192-200.
- 731 Supek, F., M. Bosnjak, N. Skunca and T. Smuc (2011). "REVIGO summarizes and visualizes long  
732 lists of gene ontology terms." PLoS One **6**(7): e21800.
- 733 Suzuki, S., M. Iwamoto, Y. Saito, D. Fuchimoto, S. Sembon, M. Suzuki, S. Mikawa, M. Hashimoto,  
734 Y. Aoki, Y. Najima, S. Takagi, N. Suzuki, E. Suzuki, M. Kubo, J. Mimuro, Y. Kashiwakura, S.  
735 Madoiwa, Y. Sakata, A. C. F. Perry, F. Ishikawa and A. Onishi (2012). "Il2rg Gene-Targeted Severe  
736 Combined Immunodeficiency Pigs." Cell Stem Cell **10**(6): 753-758.
- 737 Szczerbal, I., L. Lin, M. Stachowiak, A. Chmurzynska, M. Mackowski, A. Winter, K. Flisikowski, R.  
738 Fries and M. Switonski (2007). "Cytogenetic mapping of DGAT1, PPARA, ADIPOR1 and CREB  
739 genes in the pig." Journal of Applied Genetics **48**(1): 73-76.
- 740 Tang, D. D. (2015). "Critical role of actin-associated proteins in smooth muscle contraction, cell  
741 proliferation, airway hyperresponsiveness and airway remodeling." Respiratory Research **16**(1): 134.
- 742 Turner, N., G. J. Cooney, E. W. Kraegen and C. R. Bruce (2014). "Fatty acid metabolism, energy  
743 expenditure and insulin resistance in muscle." J Endocrinol **220**(2): T61-79.
- 744 Vincent, A., I. Louveau, F. Gondret, C. Trefeu, H. Gilbert and L. Lefaucheur (2015). "Divergent  
745 selection for residual feed intake affects the transcriptomic and proteomic profiles of pig skeletal  
746 muscle." J Anim Sci **93**(6): 2745-2758.
- 747 Wolitzky, B. A. and D. M. Fambrough (1986). "Regulation of the (Na<sup>+</sup> + K<sup>+</sup>)-ATPase in cultured  
748 chick skeletal muscle. Modulation of expression by the demand for ion transport." J Biol Chem  
749 **261**(21): 9990-9999.
- 750 Yi, Z., X. Li, W. Luo, Z. Xu, C. Ji, Y. Zhang, Q. Nie, D. Zhang and X. Zhang (2018). "Feed  
751 conversion ratio, residual feed intake and cholecystikinin type A receptor gene polymorphisms are  
752 associated with feed intake and average daily gain in a Chinese local chicken population." J Anim Sci  
753 Biotechnol **9**: 50.
- 754 Zhang, B. and S. Horvath (2005). "A general framework for weighted gene co-expression network  
755 analysis." Stat Appl Genet Mol Biol **4**: Article17.

756

## 757 **1 Data Availability Statement**

758 The data will be uploaded to GEO and released if the article is accepted

759

760

761

762

| Gene Name      | Breed    | FDR    | Regulation |
|----------------|----------|--------|------------|
| <b>PNCK</b>    | Landrace | 0.0007 | Down       |
| <b>Patr-A</b>  | Landrace | 0.08   | Down       |
| <b>MTMR11</b>  | Duroc    | 0.07   | Up         |
| <b>C3</b>      | Duroc    | 0.02   | Down       |
| <b>LCP1</b>    | Duroc    | 0.02   | Up         |
| <b>TRIM63</b>  | Duroc    | 0.08   | Down       |
| <b>KLHL30</b>  | Duroc    | 0.07   | Down       |
| <b>NANOS1</b>  | Duroc    | 0.08   | Up         |
| <b>IGHM</b>    | Duroc    | 0.07   | Up         |
| <b>ETV5</b>    | Duroc    | 0.02   | Down       |
| <b>MTFR1</b>   | Both     | 0.068  | Down       |
| <b>MGAT4A</b>  | Both     | 0.098  | Down       |
| <b>SLC38A2</b> | Both     | 0.098  | Up         |
| <b>MRPS11</b>  | Both     | 0.067  | Up         |

763 *Table 1 – Overview of genes with a FDR value < 0.1 in all 3 differential expression analysis. There*  
 764 *is only a limited amount of genes differentially expressed at 0.1 FDR level for FE. Notably, out of 4*  
 765 *genes in the common breed analysis there are two genes with mitochondrial related Gene Ontologies*  
 766 *- MRPS11, MTRM1. MTFR1 has been implicated in eating quality (measures of meat quality post*  
 767 *cooking) in cattle(Jiang, Michal et al. 2009) and as a meat PH QTL in pig(Chung, Lee et al. 2015).*  
 768 *Also interesting to note that TRIM63 has been suggested as a biomarker for difference in response to*  
 769 *exercise-induced muscle damage(Baumert, G-REX Consortium et al. 2018), KLHL30 has been*  
 770 *associated with intramuscular fat and muscle metabolism in Nelore Cattle(Dos Santos Silva,*  
 771 *Fonseca et al. 2019). MGAT4A has been linked to diabetes and glucose transport (Ohtsubo,*  
 772 *Takamatsu et al. 2005).*

*Trait*

*EdgeR*

*Limma*

*Deseq2*

|              |      |      |      |
|--------------|------|------|------|
| <i>FCR</i>   | 4    | 0    | 0    |
| <i>Breed</i> | 3633 | 3679 | 3428 |
| <i>RIN</i>   | 5572 | 5763 | 5779 |
| <i>Age</i>   | 503  | 189  | 328  |

773

774 *Table 2 – Over view over the number of genes with FDR < 0.1 in the common breed analysis for all 3*  
 775 *methods and each covariate. In general, we have modest amount of DE genes for FE, while our other*  
 776 *covariates have a amny significant genes associated with them.*

| <b>Data</b>      | <b>P-value Breed</b> | <b>Odds ratio Breed</b> | <b>P-value FCR</b> | <b>Odds ratio FCR</b> |
|------------------|----------------------|-------------------------|--------------------|-----------------------|
| <b>Dataset 1</b> | 0.0017               | 0.79                    | 0,0046             | 0.71                  |
| <b>Dataset 2</b> | 0.0012               | 0.85                    | 0.22               | 0.9                   |
| <b>Dataset 3</b> | 0.12                 | 0.84                    | 0.47               | 0.88                  |

777

778 *Table 3 – Results of Fisher exact test comparing the number of genes significant for difference in*  
 779 *rested and exercised muscle in divergent count genes for genes found in the divergent count for FCR*

780 and breed and the background for each of the 3 human data sets( dataset 1 (Devarshi, Jones et al.  
781 2018),dataset 2 (Murton, Billeter et al. 2014) and dataset 3 (Popov, Makhnovskii et al. 2019)).

782

### 783 **Figures**

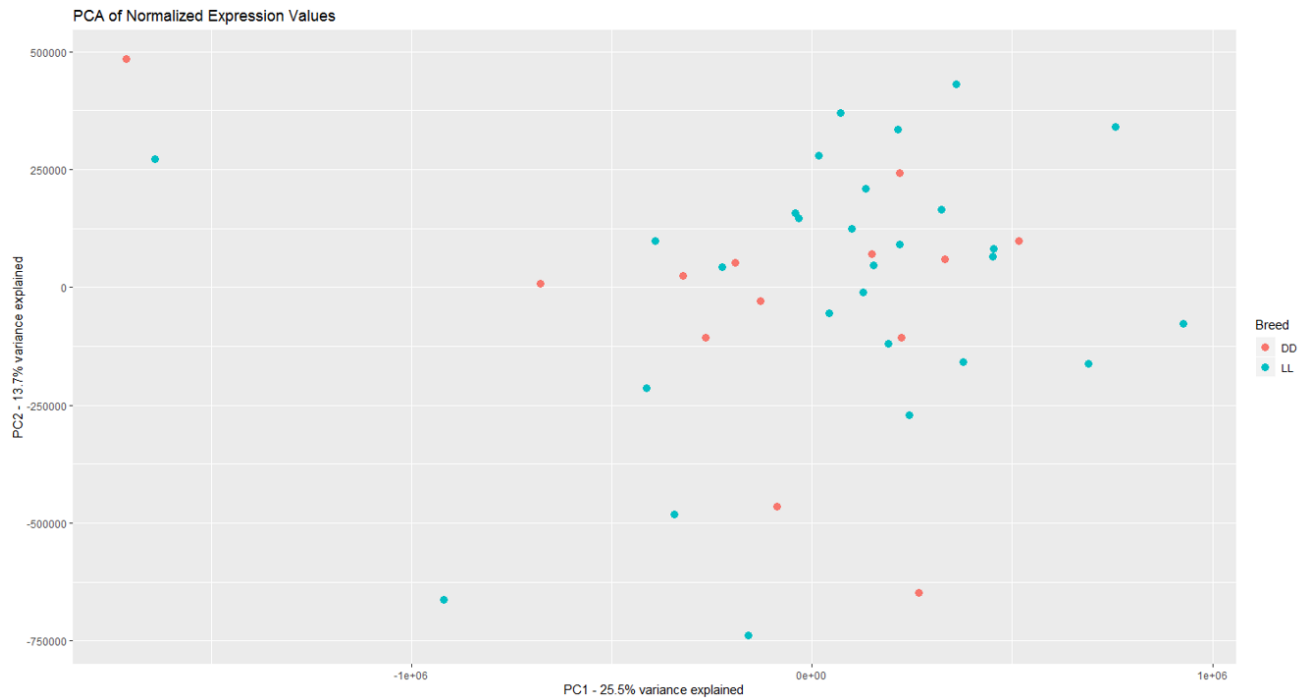

784  
785 Figure 1 Visualization of the two first principle components in the expression data, with DD being  
786 Duroc and LL being Landrace. There is not a clear separation between breeds based on the overall  
787 expression, giving credence to a joint breed analysis of the data.

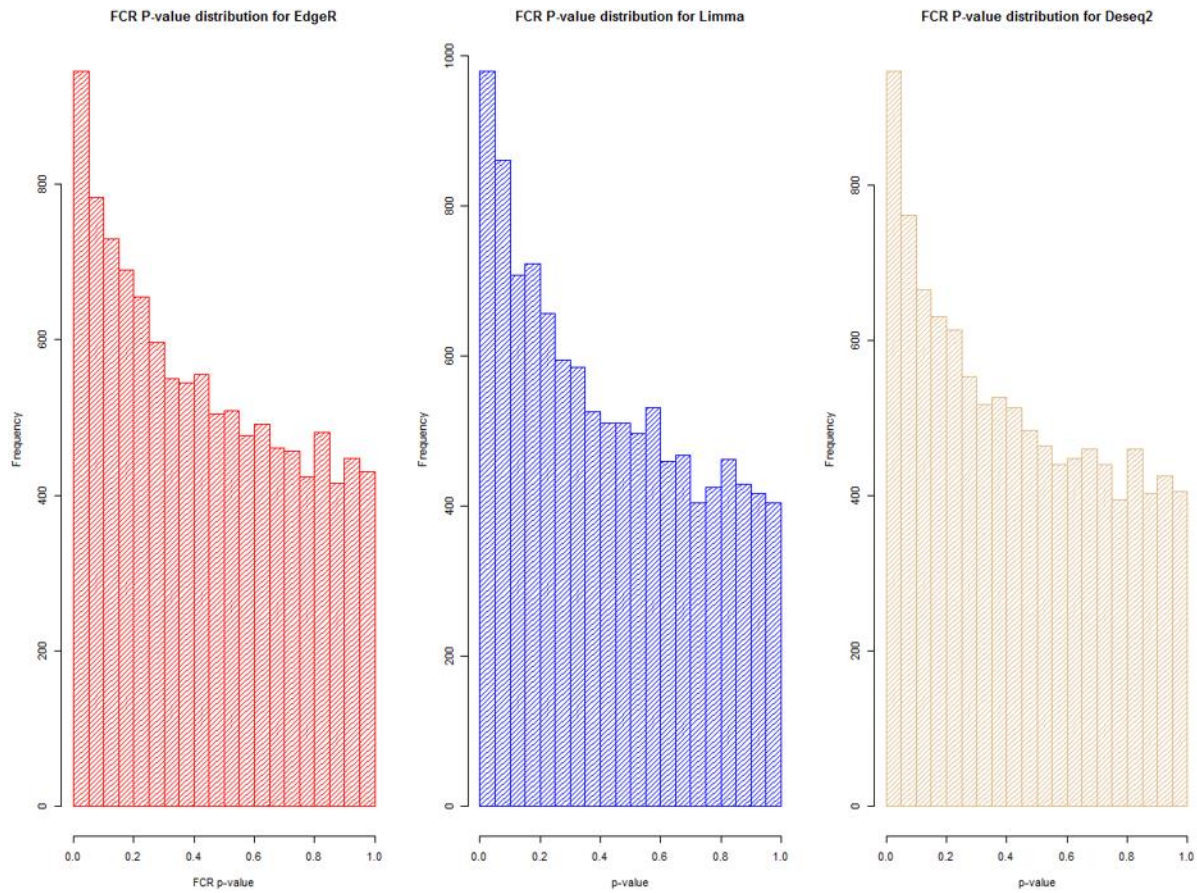

788

789 Figure 2 Visualization of the distribution of the p-values testing the relation between FCR and gene  
790 expression for all three analysis methods. It is clear in all cases that we observe an anti-conservative  
791 distribution, that is, there is an overweight of low p-values.

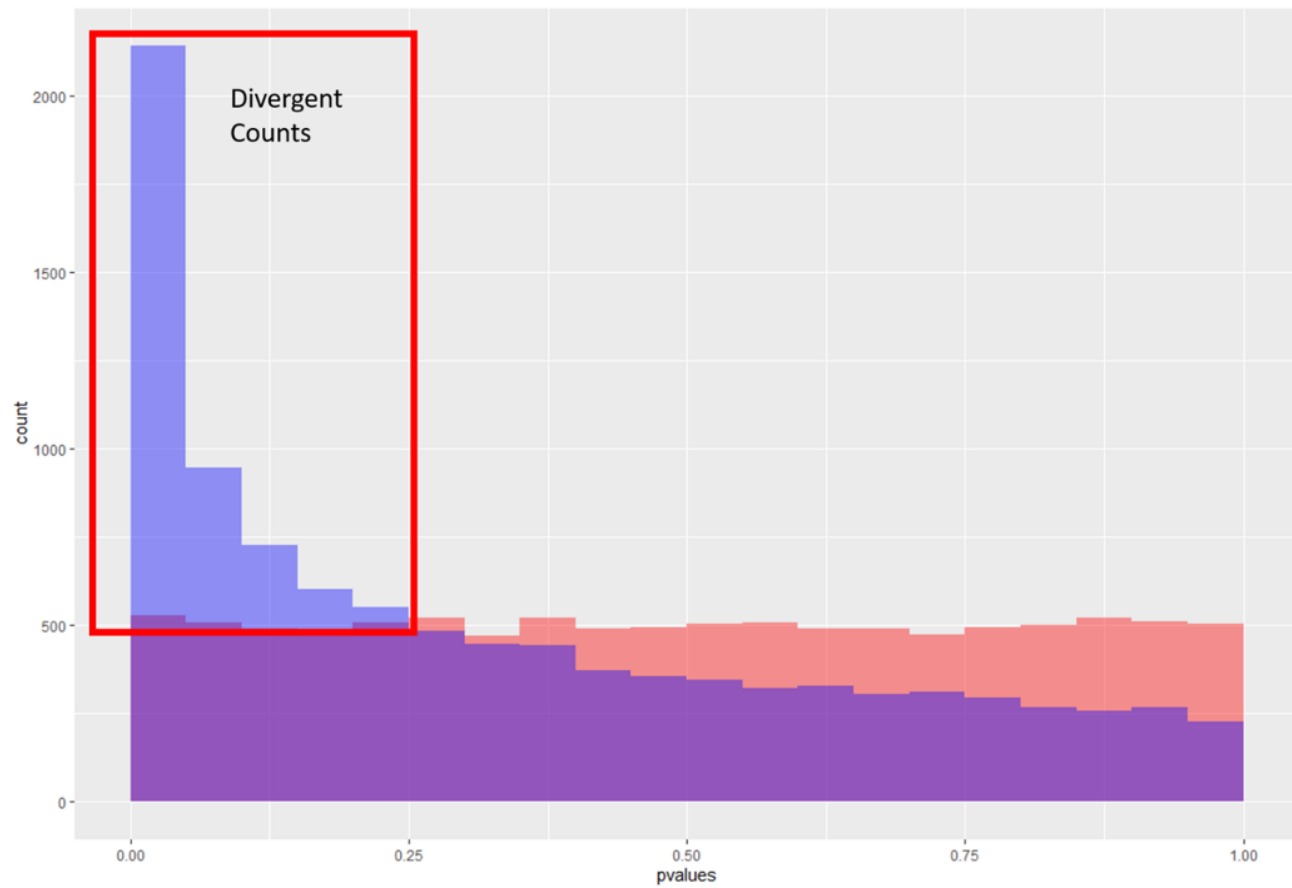

792



793 Figure 3 Schematic representation of the divergent counts. Here we see two theoretical p-value  
794 distributions, one which is uniform (in red) and one which is anti-conservative (blue). The purple  
795 area is where they overlap, and the blue area is the area used to estimate the divergent counts.

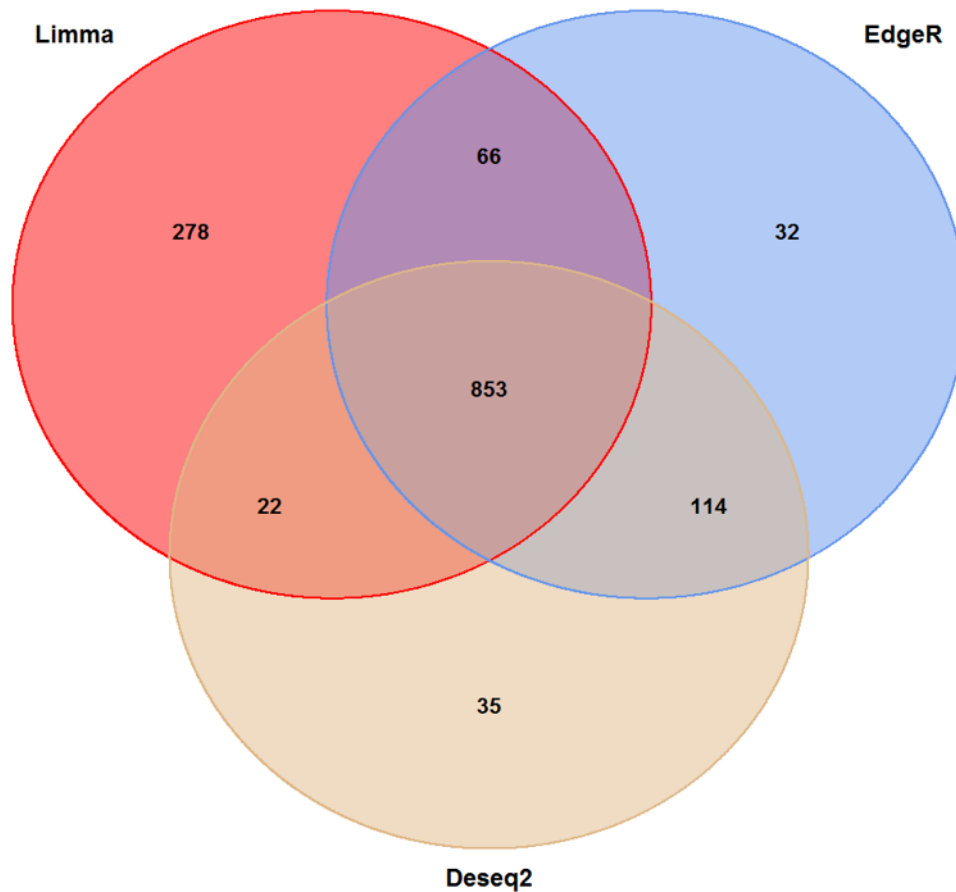

796  
797 Figure 4 Venn diagram of the overlap in the divergent counts between the three methods. We see  
798 here that the Limma is overall less conservative than the two other methods, but in general, the

799 methods are in high agreement with each other. The final set of genes selected for the enrichment  
800 analysis was the 853 triple overlapping set.

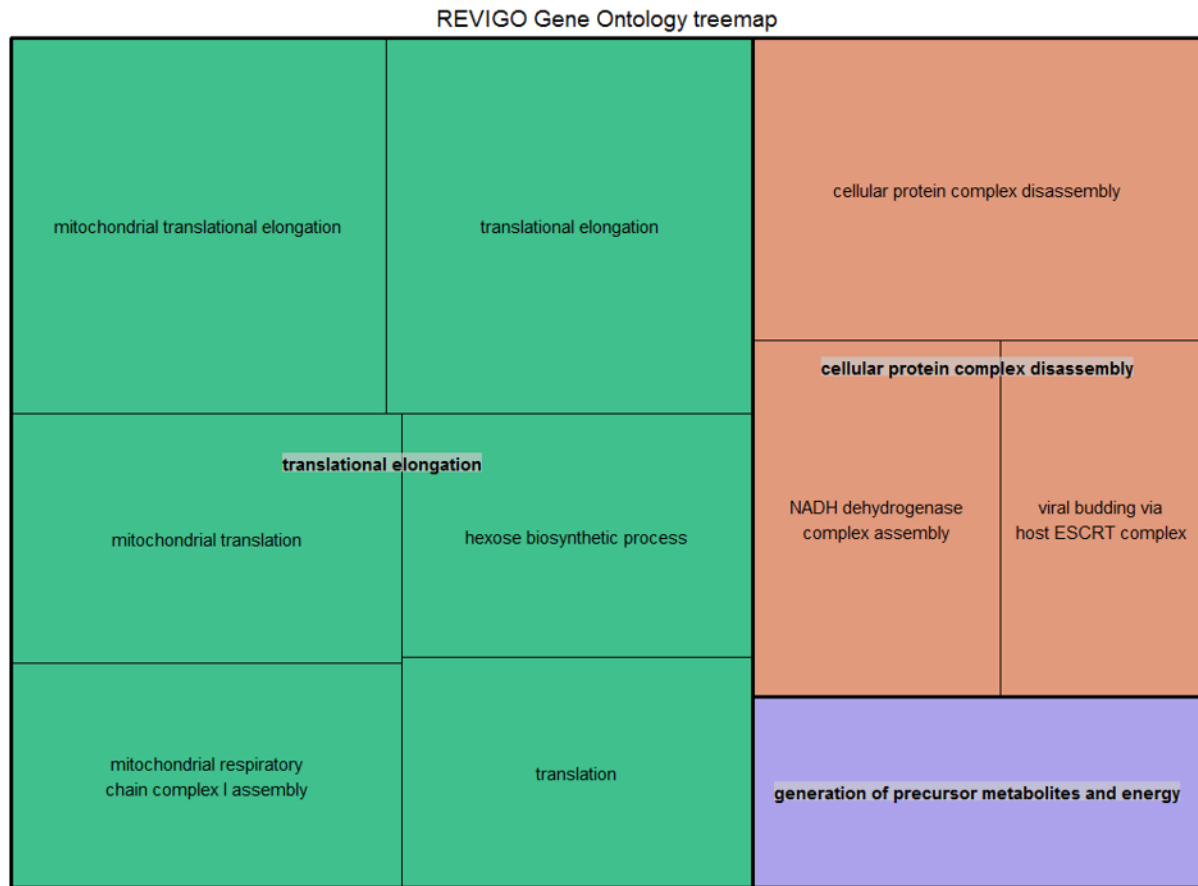

801  
802 Figure 5 Summarized representation of significant GO- for the genes set generated from the  
803 divergent count (853 total genes) overlap based from the DE analysis of FCR. The size of the boxes

804 is scaled according to the  $-\log_{10}$  of the p-value. The most significant individual terms are all in the  
 805 translation, indicating a link between mitochondrial activity and FE.

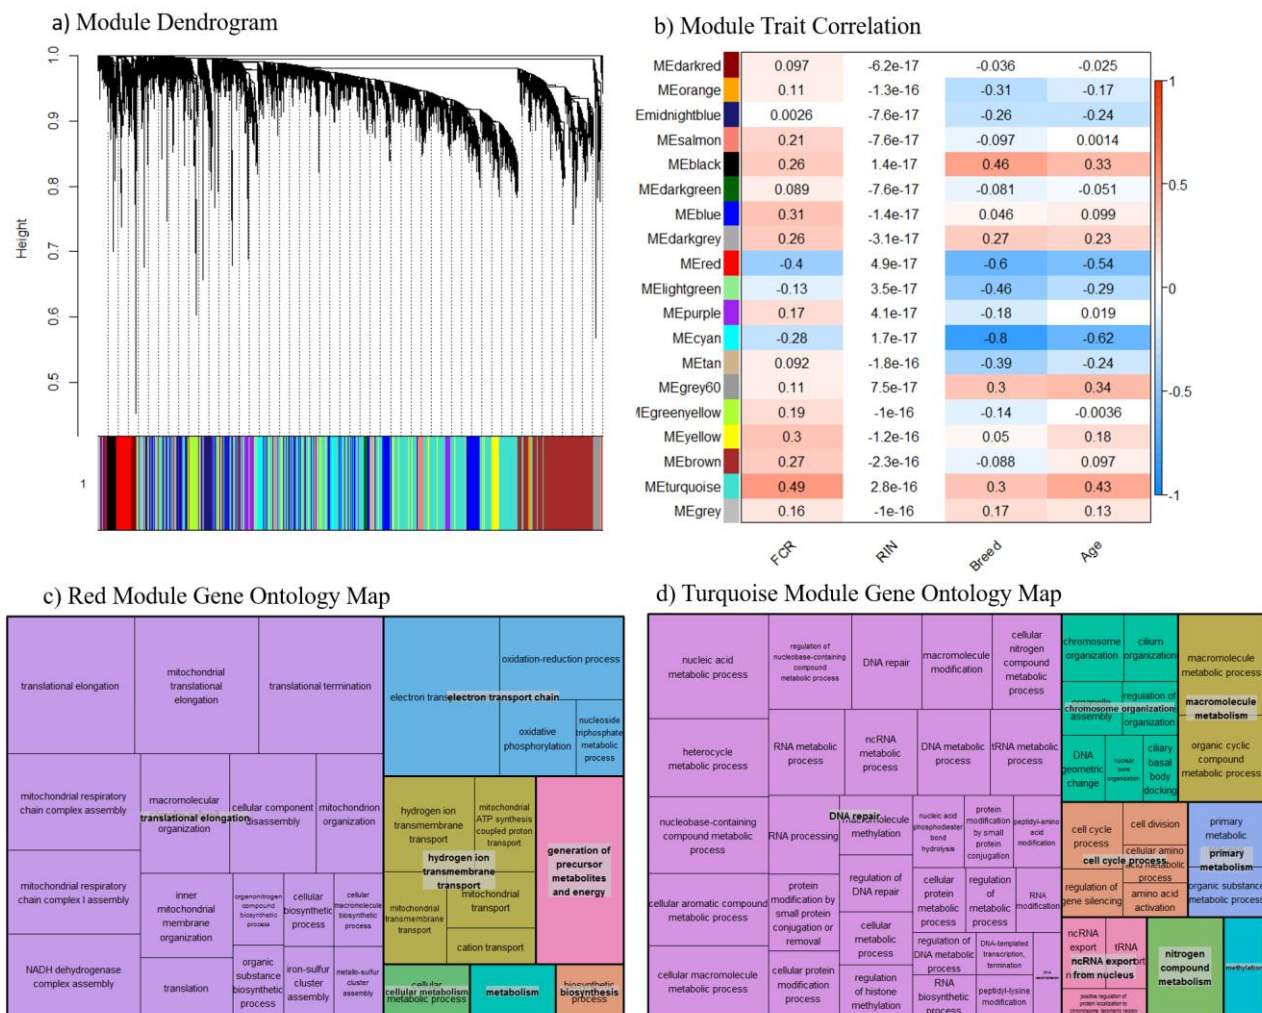

806  
807

808 Figure 6 (a) Dendrogram over the module clustering. Looking at the visual clustering not all the  
 809 modules look equally well defined, but it should be noted that the actual relations in given module  
 810 cannot be simplified to two dimensions, as all the relations between the genes exist in N  
 811 dimensional space, where N is the number of genes. (b) Correlation between module eigenvalue and  
 812 our traits, including RIN. We see here that the correlation to RIN is essentially 0 in all cases,  
 813 indicating our linear correction method has worked well. Based on the top two modules (c)  
 814 Summarized representation of significant GO- for genes in the red module of the WGCNA network  
 815 analysis. The three largest groups are all associated with mitochondria, mirroring the results found in  
 816 the differential expression analysis and the gene interaction analysis. (b) Summarized representation  
 817 of significant GO- for genes in the turquoise module of the WGCNA network analysis. The main  
 818 grouping here is DNA repair, which is not found in our other analysis. This may represent that  
 819 increased energy expenditure on maintenance processes is reducing FE.

820

a) Breed Gene Ontology Map

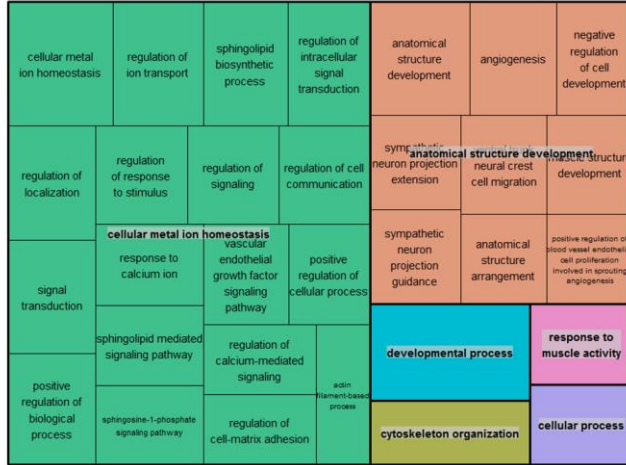

b) FCR Gene Ontology Map

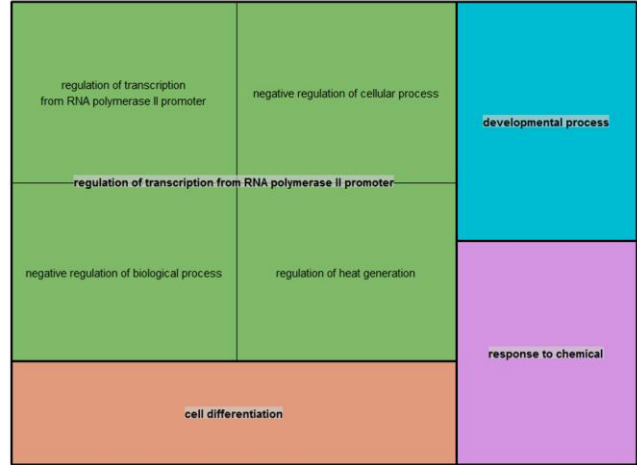

821

822 Figure 7 (a) Summarized representation of significant GO- for genes significantly associated with  
 823 exercise in one of the three human dataset and between the breeds, based on a total of 702 genes. The  
 824 size of the boxes is scaled according to the  $-\log_{10}$  of the p-value. Here we find two overall main  
 825 categories, cellular metal ion homeostasis and anatomical structure development. (b) Summarized  
 826 representation of significant GO- for genes significantly associated with exercise in one of the three  
 827 human dataset and in our divergent set for FCR. The size of the boxes is scaled according to the -  
 828  $\log_{10}$  of the p-value. Here the main process is regulation of transcription from RNA polymerase.  
 829 Overall, the categories are not very significant here as it is only based on 42 genes.

830

831

832

833

834

835

836

837
